## Vascular Endothelial Estrogen Receptor $\alpha$ Is Modulated by Estrogen Status and Related to Endothelial Function and Endothelial Nitric Oxide Synthase in Healthy Women

Kathleen M. Gavin, Douglas R. Seals, Annemarie E. Silver, and Kerrie L. Moreau

Department of Integrative Physiology (K.M.G., D.R.S., A.E.S., K.L.M.), University of Colorado at Boulder, Boulder, Colorado 80309; and Division of Geriatric Medicine (K.M.G., D.R.S., K.L.M.), Department of Medicine, University of Colorado Denver, Aurora, Colorado 80045

**Context and Objective:** Estrogen receptor  $\alpha$  (ER $\alpha$ ), a potent transcription factor expressed in vascular endothelial cells, plays a key role in regulating vascular function and health. We determined whether vascular endothelial cell expression of ER $\alpha$  is influenced by estrogen status and is related to vascular endothelial function in healthy women.

**Methods:** ER $\alpha$  protein expression was measured (quantitative immunofluorescence) in endothelial cells from peripheral veins of 16 healthy, premenopausal women during the early follicular (EF) and late follicular (LF) phases of the menstrual cycle and 17 estrogen-deficient postmenopausal women. Endothelial-dependent dilation (EDD; brachial artery flow-mediated dilation) and endothelial nitric oxide synthase (eNOS) expression and activation were also measured in a subgroup of women.

**Results:** In premenopausal women ( $n = 10$ ), ER $\alpha$  expression was 30% lower ( $P < 0.001$ ) during the EF (low estrogen) compared with the LF (high estrogen) phase of the menstrual cycle. In postmenopausal women, ER $\alpha$  expression was 33% lower ( $P < 0.001$ ) compared with the LF phase of the menstrual cycle in premenopausal women. ER $\alpha$  expression was strongly related ( $r = 0.67$ ;  $P < 0.001$ ) to EDD, which was reduced in postmenopausal women. ER $\alpha$  abundance was positively related to expression of eNOS ( $r = 0.54$ ;  $P = 0.009$ ;  $n = 21$ ) and ser1177 phosphorylated eNOS ( $r = 0.59$ ;  $P = 0.006$ ;  $n = 20$ ).

**Conclusions:** These results provide the first evidence that expression of ER $\alpha$  in vascular endothelial cells is modulated by estrogen status and may be a key determinant of vascular endothelial function in healthy pre- and postmenopausal women. ER $\alpha$  expression may influence vascular endothelial function in women by affecting protein levels and activation of eNOS. (*J Clin Endocrinol Metab* 94: 3513–3520, 2009)

The prevalence of cardiovascular diseases (CVDs) is lower in premenopausal women than in men of similar age but increases markedly in women after menopause (1), presumably due in part to estrogen deficiency. The increased risk of CVD in estrogen-deficient postmenopausal women is associated with vascular endothelial dysfunction, as indicated by a reduction in endothelium-de-

pendent dilation (2, 3). Thus, changes to the vascular endothelium as a result of reductions in circulating estrogen seem to contribute to increased CVD risk after menopause.

A key mechanism linking estrogen status to the function and health of the vascular endothelium may be estrogen receptors (ER)  $\alpha$  and  $\beta$ . ER $\alpha$  is more highly ex-

pressed in endothelial cells than ER $\beta$  and is believed to play a more important role in mediating the effects of estrogen in the vascular endothelium (4–6). Findings from cell culture and ER $\alpha$  knockout mice indicate that estrogen may regulate vascular endothelial function via ER $\alpha$  modulation of endothelial nitric oxide synthase (eNOS) (7, 8), the enzyme responsible for nitric oxide (NO) synthesis in endothelial cells.

Vascular endothelial ER expression is plastic. In animals, endothelial ER $\alpha$  abundance decreases after ovariectomy (7, 9). In culture, endothelial cell ER $\alpha$  expression can increase within hours of incubation with physiological concentrations of estrogen (10). Taken together, these observations suggest that estrogen status may modulate endothelial ER $\alpha$  expression *in vivo* in women and influence vascular endothelial function, possibly via effects on eNOS. However, there is no direct evidence in humans supporting this possibility.

In the present study, we tested this hypothesis in healthy women. Using a novel translational approach, we obtained endothelial cells from peripheral veins of premenopausal women during low and high estrogen phases of their menstrual cycles and from postmenopausal women, and we measured ER $\alpha$  expression using quantitative immunofluorescence. We also explored the relations between endothelial cell ER $\alpha$  expression, endothelial-dependent dilation (EDD), and eNOS expression and activation in a subgroup of women.

## Subjects and Methods

### Subjects

Thirty-three healthy women were studied: 16 eumenorrheic premenopausal women (18–33 yr of age), and 17 estrogen-deficient postmenopausal women (48–63 yr of age). All subjects were normotensive, nonsmokers, not taking any medications, sedentary or recreationally active, and free of overt chronic diseases as assessed by medical history and physical examination. Postmenopausal women were further evaluated by standard blood chemistries and hematological evaluation and by electrocardiogram and blood pressure responses during incremental treadmill exercise to exhaustion. All postmenopausal women were at least 1 yr without menses and had not taken hormone therapy for at least 6 months. All subjects gave their written informed consent to participate. All procedures were reviewed and approved by the University of Colorado at Boulder Human Research Committee and the Colorado Multiple Institutional Review Board and were performed in the University of Colorado at Boulder and the University of Colorado Denver General Clinical Research Centers.

### Study design

To determine the effects of estrogen-deficient states *vs.* estrogen-replete states on ER $\alpha$  expression, peripheral venous endothelial cells and blood were obtained in 10 premenopausal

women across one menstrual cycle: during the early follicular (EF; 2–6 d after onset of menses), and late follicular [LF; 24–48 h after positive ovulation test measured using urine ovulation prediction kits (ClearPlan Easy; Unipath Diagnostics, Waltham, MA)] phases and in the postmenopausal women. To explore the relations among menopause-associated reductions in EDD and ER $\alpha$  expression and eNOS expression and activation, EDD was measured, and vascular endothelial cells were obtained in the postmenopausal women and in six additional premenopausal women who were studied during the early to midfollicular phase (2–8 d after onset of menses).

### Study procedures

All women were studied after a 10–12 h overnight fast (water only) and with no vigorous physical activity over the prior 20+ hours.

### Subject characteristics

Body mass index (BMI) was measured from height and body mass. Arterial blood pressure and heart rate were measured over the brachial artery during seated rest using a semiautomated device (Dynamap XL, Johnson & Johnson, Langhorne, PA).

### Vascular endothelial cell protein expression

The procedures used for the collection and measurements of venous vascular endothelial cells have been described in detail previously (11–16). Briefly, endothelial cells were collected from an antecubital vein using two sterile J-wires advanced (~4 cm beyond the tip of the catheter) and retracted through an 18-gauge catheter. The wires were transferred to a dissociation buffer solution, and cells were recovered by washing and centrifugation. Cells were fixed with 3.7% formaldehyde and plated on poly-L-lysine coated slides (Sigma Chemical, St. Louis, MO).

For immunofluorescence staining, cells were rehydrated with PBS and rendered permeable using 0.1% Triton X-100 (Alfa Aesar, Ward Hill, MA). After blocking nonspecific binding sites with 5% donkey serum (Jackson ImmunoResearch, West Grove, PA), cells were incubated with monoclonal antibodies for one of the following: ER $\alpha$  (Santa Cruz Biotechnology Inc., Santa Cruz, CA), eNOS (Transduction Laboratories, Lexington, KY), and phosphorylated-eNOS-Ser1177 (Calbiochem, San Diego, CA). Cells were next incubated with a CY3-conjugated secondary antibody (Jackson ImmunoResearch).

Slides were systematically scanned using a fluorescence microscope (Eclipse 600, Nikon, Melville, NY) to identify endothelial cells (positive staining of von Willebrand factor), and nuclear integrity was confirmed using DAPI (4',6'-diamidino-2-phenylindole hydrochloride) staining. Endothelial cell images (Figs. 1 and 2) were digitally captured by a Photometrics CoolSNAPfx digital camera (Roper Scientific, Inc., Tucson AZ) and analyzed using Metamorph Software (Universal Imaging Corp., Downingtown, PA) to quantify the intensity of CY3 staining (*i.e.* average pixel intensity). The software program allowed for systematic quantification of staining intensity and eliminated human subjectivity in analysis. Values are reported as ratios of endothelial cell protein expression/human umbilical vein endothelial cell (HUVEC; control cells) protein expression. Reporting ratios minimizes the potential confound of differences in intensity of staining among different staining sessions. Technicians were blinded to subject identity during the staining and analysis procedures.

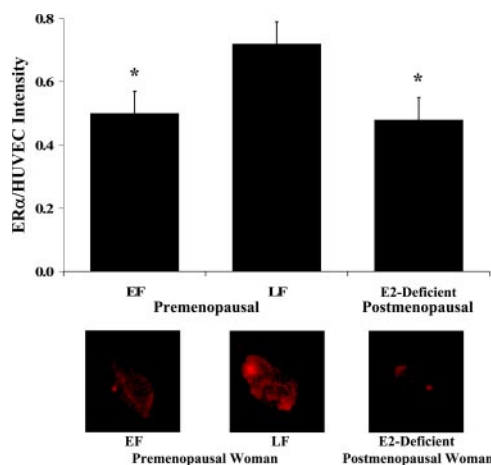

**FIG. 1.** ER $\alpha$  protein expression in endothelial cells collected during the EF and LF phases of the menstrual cycle in premenopausal women and in estrogen-deficient postmenopausal women. Values are mean  $\pm$  SE. Representative immunofluorescent images from a premenopausal woman measured during the EF and LF phases of the menstrual cycle and a postmenopausal woman are shown. \*,  $P < 0.001$  vs. LF.

The present technique of quantitative immunofluorescence of human endothelial cells was originally validated against immunoblotting previously by Colombo *et al.* (11) with an excellent correlation coefficient ( $r = 0.99$ ), and more recently by our laboratory (correlation coefficient  $r = 0.97$ ;  $P = 0.007$ ) (17).

### Vascular endothelium-dependent dilation

Ultrasound measurements of brachial artery flow-mediated dilation (FMD) were performed according to the method originally described by Celermajer *et al.* (18) and as previously described by our laboratory (15, 19, 20). The dilation of the brachial artery in response to the stimulus of forearm ischemia has been shown to be dependent on the release of vasodilators, predominantly NO, from the vascular endothelium (21).

### Sex hormone concentrations

Serum concentrations of estradiol and progesterone were measured via RIA by the University of Colorado General Clinical Research Center Core Laboratory.

### Statistical analysis

To determine the effect of menstrual cycle phase (EF vs. LF) on the primary outcome, endothelial ER $\alpha$  expression, and sex hormone levels, a paired  $t$  test was used. An unpaired  $t$  test was used to determine the effect of age/menopausal status (postmenopausal vs. premenopausal measured at the EF and LF menstrual cycle phases) on endothelial ER $\alpha$  expression. Univariate

correlation analyses were used to determine the relation between endothelial ER $\alpha$  expression and EDD, eNOS expression, phosphorylated-eNOS expression, and other variables of interest (*i.e.* estrogen concentrations). Statistical significance was defined as  $P \leq 0.05$ . All data are reported as mean  $\pm$  SE. Data analysis was performed with SPSS software, version 16.0 (SPSS Inc., Chicago, IL).

## Results

The characteristics of the subject groups are presented in Table 1. Postmenopausal women were older and had a higher body mass, BMI, and systolic blood pressure compared with the premenopausal women (all  $P < 0.05$ ). Postmenopausal women were on average  $7 \pm 1$  yr postmenopause (range, 1–20 yr). Thirteen of the women were prior hormone therapy users (mean,  $3.2 \pm 1.0$  yr; range, 0.5–10 yr) but were estrogen-deficient for  $3.5 \pm 1.0$  yr (range, 0.6–10 yr).

### Vascular endothelial cell ER $\alpha$ protein expression is related to circulating estradiol in premenopausal women

In the 10 premenopausal women studied serially during their menstrual cycles, serum estradiol and progesterone concentrations were  $36 \pm 7$  and  $83 \pm 17$  pg/ml ( $130 \pm 24$  and  $301 \pm 62$  pmol/liter, respectively;  $P = 0.005$ ) and  $0.4 \pm 0.1$  and  $4.0 \pm 1.7$  ng/ml ( $2.2 \pm 0.2$  and  $12.8 \pm 5.4$  nmol/liter, respectively) during the EF and LF phases, respectively ( $P = 0.10$ ). Vascular endothelial cell ER $\alpha$  expression was 30% lower ( $0.51 \pm 0.07$  vs.  $0.72 \pm 0.07$  ER $\alpha$  intensity/HUVEC intensity;  $P < 0.001$ ) during the EF phase compared with the LF phase (Fig. 1). ER $\alpha$  expression was positively related to serum estradiol concentrations during the EF phase ( $r = 0.62$ ;  $P < 0.05$ ) and when the phases were pooled ( $r = 0.43$ ;  $P < 0.05$ ). These results indicate that endothelial cell ER $\alpha$  protein expression is modulated by circulating estrogen during the menstrual cycle in healthy premenopausal women.

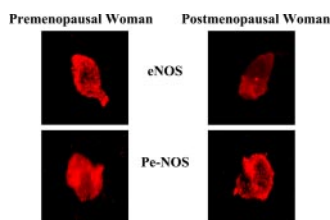

**FIG. 2.** Representative immunofluorescent images of eNOS and phosphorylated-eNOS-Ser1177 (Pe-NOS) proteins from a premenopausal woman and a postmenopausal woman.

**TABLE 1.** Subject characteristics

| Variable                 | Postmenopausal | Premenopausal    |
|--------------------------|----------------|------------------|
| n                        | 17             | 16               |
| Age (yr)                 | $57 \pm 1$     | $24 \pm 1$       |
| Height (cm)              | $164 \pm 1$    | $166 \pm 2$      |
| Body mass (kg)           | $71.6 \pm 3.7$ | $59.4 \pm 4^a$   |
| BMI (kg/m <sup>2</sup> ) | $26.6 \pm 1.2$ | $21.6 \pm 1.4^a$ |
| Systolic BP (mm Hg)      | $116 \pm 3$    | $107 \pm 3^a$    |
| Diastolic BP (mm Hg)     | $68 \pm 3$     | $64 \pm 3$       |

Data are expressed as mean  $\pm$  SE. BP, Blood pressure.

<sup>a</sup>  $P < 0.05$  vs. postmenopausal.

### Endothelial ER $\alpha$ expression is reduced in estrogen-deficient postmenopausal women

In the postmenopausal women, serum estradiol was  $30 \pm 6$  pg/ml ( $110 \pm 13$  pmol/liter), which was not different from concentrations in the premenopausal women during the EF phase but was lower than concentrations during the LF phase. Serum progesterone concentration was  $0.3 \pm 0.8$  ng/ml ( $0.9 \pm 0.1$  nmol/liter) in the postmenopausal women, which was lower ( $P < 0.001$ ) than the concentrations measured during the EF and LF phases of the premenopausal women [ $0.7 \pm 0.1$  ( $2.2 \pm 0.20$ ) and  $4 \pm 1.7$  ng/ml ( $12.8 \pm 5.4$  nmol/liter), respectively]. Consistent with their lower circulating estradiol concentrations, endothelial cell ER $\alpha$  expression was 33% lower ( $0.48 \pm 0.07$  ER $\alpha$  intensity/HUVEC intensity;  $P < 0.001$ ) in the postmenopausal women compared with expression in the LF phase of the menstrual cycle in premenopausal women (Fig. 1). Similarly, ER $\alpha$  expression in the postmenopausal women was equivalent to expression measured in the EF phase of the premenopausal women (Fig. 1). Among postmenopausal and premenopausal (LF phase) women, ER $\alpha$  protein expression was positively related to circulating estrogen ( $r = 0.42$ ;  $P < 0.05$ ) but not progesterone ( $r = 0.08$ ;  $r = 0.71$ ) concentrations. These observations suggest that ER $\alpha$  expression is reduced in estrogen-deficient postmenopausal women and is related to their lower circulating concentrations of estrogen.

### Endothelial cell ER $\alpha$ expression is related to EDD and endothelial cell eNOS expression

Brachial artery FMD was 30% lower in the postmenopausal compared with premenopausal vascular function controls ( $n = 6$ ) ( $5.0 \pm 0.6\%$  vs.  $7.2 \pm 0.7\%$ ;  $P < 0.05$ ). Brachial artery FMD was positively related to endothelial ER $\alpha$  expression both in the overall group ( $r = 0.67$ ;  $P < 0.001$ ; Fig. 3) and among the postmenopausal women ( $r = 0.70$ ;  $P = 0.002$ ). In the overall group, ER $\alpha$  expression also was positively related to endothelial cell expression of eNOS protein ( $r = 0.56$ ;  $P = 0.009$ ;  $n = 21$ ) and phos-

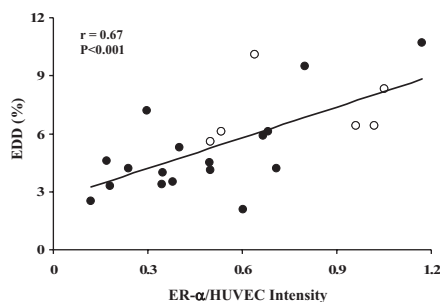

**FIG. 3.** Relation between EDD and ER $\alpha$  expression in vascular endothelial cells obtained from premenopausal (open circles) and postmenopausal women (solid circles). Each symbol represents the response of an individual woman.

phorylated-eNOS-Ser1177 ( $r = 0.59$ ;  $P = 0.006$ ;  $n = 20$ ) (Fig. 4). Among the postmenopausal women, brachial artery FMD, ER $\alpha$  expression, and endothelial cell expression of eNOS and phosphorylated-eNOS-Ser1177 were not related to plasma total cholesterol, low-density lipoprotein-cholesterol, high-density lipoprotein-cholesterol, or any other subject characteristic or risk factor. These results indicate that the reduced endothelial cell ER $\alpha$  expression in estrogen-deficient postmenopausal women is related to their impaired EDD, reduced expression of eNOS protein, and decreased eNOS activation.

### Discussion

The results of the present study provide novel insight into the role of estrogen status on *in vivo* ER $\alpha$  protein expression in vascular endothelial cells and its functional relation to EDD in healthy women. First, we found that states of short-term and chronic estrogen deficiency, *i.e.* a low-estrogen phase of the menstrual cycle and postmenopausal status, are associated with reduced endothelial cell ER $\alpha$  expression. Second, the abundance of endothelial ER $\alpha$  is positively related to EDD. Third, endothelial ER $\alpha$  expression also is positively related to both eNOS protein and an activated state of eNOS. Taken together, these findings support the idea that in healthy women endothelial ER $\alpha$  expression is regulated by physiological concentrations of

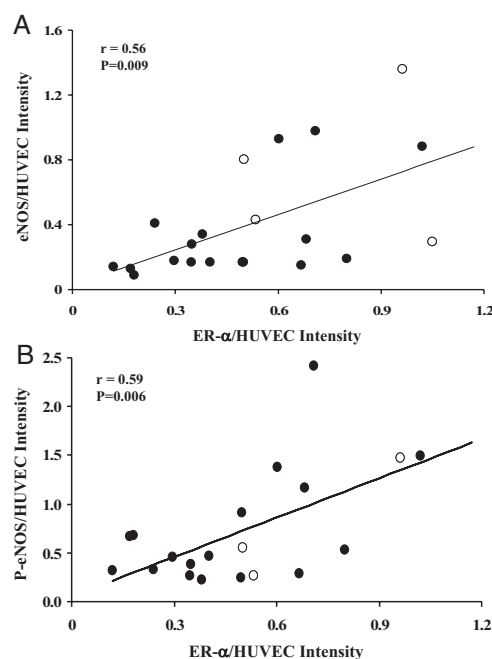

**FIG. 4.** Relation between eNOS (A) and phosphorylated-eNOS-Ser1177 (Pe-NOS) (B) and ER $\alpha$  expression in vascular endothelial cells obtained from premenopausal (open circles) and postmenopausal women (solid circles). Each symbol represents the response of an individual woman.



estrogen and that ER $\alpha$  influences vascular endothelial function, in part by modulating eNOS and its state of activation.

### Menstrual cycle phase and endothelial cell ER $\alpha$ protein expression

Because of its varying sex hormone state, the menstrual cycle provides a natural physiological setting in which to isolate the independent effect of estrogen on vascular function without the confounding effects of changes with menopause, aging, or other pathophysiological influences. EDD varies during the menstrual cycle, with lower EDD observed in the EF compared with the LF phase suggesting a modulatory effect of estrogen on vascular endothelial function (22, 23). Consistent with this, we found lower ER $\alpha$  expression in endothelial cells collected during the low estrogen (EF) phase compared with the high estrogen (LF) phase of the menstrual cycle in healthy premenopausal women. ER $\alpha$  was positively related to circulating estrogen concentrations, providing further evidence for a direct influence of circulating estrogen on endothelial cell ER $\alpha$  expression. Our data are in agreement with previous studies demonstrating cyclic changes in ER $\alpha$  within the reproductive tract during the menstrual cycle in women (24, 25). In these studies, ER $\alpha$  was higher in the endometrial vasculature and myometrium during the late proliferative and early secretory phases of the menstrual cycle and was related to the preovulatory estrogen surge.

### Endothelial cell ER $\alpha$ expression is reduced in estrogen-deficient postmenopausal women

The present findings demonstrate for the first time that *in vivo* endothelial cell ER $\alpha$  is reduced in healthy estrogen-deficient postmenopausal women compared with premenopausal women. The lower endothelial cell ER $\alpha$  appears to be related, in part, to lower circulating estrogen levels in that: 1) ER $\alpha$  expression was positively related to serum estrogen concentrations; and 2) differences in ER $\alpha$  expression between the postmenopausal and premenopausal women only are observed during the LF phase when serum estrogen concentrations differ between the groups.

These observations are consistent with ER $\alpha$  expression in reproductive tissue from premenopausal and postmenopausal women (25). Specifically, estrogen-deficient postmenopausal had lower expression of ER $\alpha$  compared with premenopausal women studied during periovulatory and secretory phases, but not the midproliferative phase of the menstrual cycle. Estrogen administration increased ER $\alpha$  expression in myometrium from postmenopausal women to levels observed in the premenopausal women. In turn, reductions in estrogen using a gonadotropin-re-

leasing hormone agonist decreased ER $\alpha$  expression in myometrium from premenopausal women to levels observed in postmenopausal women (25).

Our findings also confirm in healthy women observations in animal and *in vitro* cell culture studies showing that ER $\alpha$  expression in vascular cells is regulated by endocrine status (7, 9, 10). For example, ER $\alpha$  expression is decreased with ovariectomy and increased with chronic estrogen treatment in female rat cerebral blood vessels and the aortic endothelium (7, 9). Moreover, long-term exposure to physiological concentrations of estrogen causes an increase in ER $\alpha$  protein in human umbilical vein endothelial cells (10). Taken together, the lower ER $\alpha$  protein in postmenopausal women appears to be mediated at least partly by estrogen deprivation.

We recognize that other mechanisms likely modulate ER $\alpha$  protein expression in postmenopausal women. Multiple cellular systems have been implicated in the regulation of ER $\alpha$  besides endocrine status, including changes in chromatin structure and pathological conditions including inflammation and diabetes (26, 27). For example, aging is associated with epigenetic changes including methylation of a cytosine- and guanine-rich area in promoter regions (CPG islands). DNA methylation is associated with permanent inactivation of gene transcription (28). In this regard, an age-related increase in ER $\alpha$  gene methylation has been reported in atrial tissues obtained from men and women undergoing coronary artery bypass surgery and in normal human colon (29, 30). Thus, it is possible that DNA methylation also contributed to the reduced endothelial ER $\alpha$  protein expression in our postmenopausal women. It also is plausible that vascular inflammation or related processes may have contributed to the reduced ER $\alpha$  protein expression (25). However, it is unlikely that pathological conditions such as diabetes, hypertension, or CVD were involved because we studied only healthy, normotensive postmenopausal women without major risk factors for CVD or evidence of overt clinical diseases.

### Endothelial cell ER $\alpha$ expression, EDD, and eNOS

Consistent with previous studies (2, 3), we found that EDD is reduced in healthy estrogen-deficient postmenopausal women. Impaired EDD is characterized by a shift in the balance of endothelium-derived vasodilators/constrictors featuring reduced NO bioavailability (32). In women, the age-related decline in EDD only is evident after the menopause transition (2). Such observations suggest that the loss of circulating estrogen with menopause contributes to the impairment of vascular endothelial function in postmenopausal women.

Estrogen modulates vascular endothelial function in part by enhancing NO release and promoting vasodilation (5). Estrogen triggers the release of NO through ER $\alpha$ -

mediated genomic and nongenomic mechanisms. This occurs via activation of eNOS as well as by increasing eNOS protein via transcriptional regulation of the eNOS gene (33, 34). Functional ER $\alpha$  appears to be required for normal vascular function and influences the bioavailability of NO independent of the concentration of circulating estrogen (8, 35). Indeed, basal NO production is related to the number of estrogen binding sites in male mouse aorta regardless of circulating concentrations of estrogen (8). Additionally, reduced NO production and impaired EDD are observed in ER $\alpha$  knockout mice and a male patient with an ER $\alpha$  mutation, respectively (8, 36). Prolonged estrogen deprivation results in a marked reduction in ER $\alpha$  expression, resulting in a functional impairment of the ER $\alpha$ /eNOS signaling network (7). These data raise the possibility that eNOS and NO bioavailability could be influenced by ER $\alpha$  expression rather than the concentration of circulating estrogen. Our results show for the first time that endothelial cell ER $\alpha$  is positively related to EDD, eNOS protein, and a common phosphorylated state associated with eNOS activation (phosphorylated-eNOS-Ser1177) in healthy women.

### Limitations

There are several limitations associated with the present study. Our measurements of protein expression were performed in endothelial cells collected from veins rather than arteries because of the difficulty of invasively obtaining endothelial cells from arteries on repeated measures across the menstrual cycle. However, we (15, 37) and others (11) have demonstrated that age- and CVD-related group differences in protein expression in arterial endothelial cells are consistently reflected in endothelial cells obtained from veins and that, among individual subjects, significant positive correlations exist in protein expression measured in endothelial cells obtained from peripheral veins and arteries. We recognize that only ER $\alpha$  was assessed and not ER $\beta$ , consistent with our study aim, and that quantitative immunofluorescence has limitations. However, quantitative immunofluorescence has been validated against immunoblotting by our laboratory and others (11, 17), and the number of endothelial cells that can be obtained from our human subjects does not yield enough total protein or mRNA to use alternative techniques such as Western blotting or real-time RT-PCR. Additionally, we are unable to quantify the intensity of the CY3 stain by endothelial cell location (*i.e.* membrane, cytosol, or nuclear). We wish to emphasize that despite these limitations, we were able to demonstrate differences in endothelial ER $\alpha$  protein expression between estrogen-deficient and estrogen-replete states, and that our experimental approach allowed us to characterize the influence

of circulating estrogen status on ER $\alpha$  expression and other characteristics of the vascular endothelium in women in the absence of confounding clinical disease.

### Clinical significance

Our findings have important clinical implications. CVD is now considered a major public health concern for women (38), and vascular aging featuring an impairment in endothelial function is recognized as a key factor in the etiology of CVD (39). Indeed, women endure a “double whammy” in that arteries are exposed to adverse changes in other risk factors during a time (menopause) of vulnerability to damage mediated by changes in the hormonal environment. As such, a better understanding of the cellular and molecular mechanisms regulating vascular health in women with aging clearly is needed. In this regard, the present findings provide the first evidence that *in vivo* endothelial ER $\alpha$  protein expression is influenced by circulating estrogen status, and that reduced ER $\alpha$  expression is related to impaired EDD in postmenopausal women. Our findings also provide insight into molecular mechanisms that may be involved, namely that endothelial cell ER $\alpha$  expression is positively related to eNOS protein and its state of activation in healthy women.

These observations are important in that a reduction/absence of ER $\alpha$  is found in atherosclerotic compared with normal coronary arteries of premenopausal and postmenopausal women (40), and premature coronary artery disease has been observed in a male patient with an ER $\alpha$  mutation, suggesting that ER $\alpha$  may play a role in protection against CVD (31, 36). Thus, a decrease or lack of functional ER $\alpha$  may be considered a novel risk factor for the development of CVD (8). Future studies need to determine whether chronic estrogen administration can preserve vascular ER $\alpha$  expression during menopause and postmenopause, allowing target tissues to remain responsive to estradiol (26).

### Conclusions

In conclusion, our results provide experimental support to the idea that endothelial ER $\alpha$  expression is regulated by circulating estrogen concentrations, is reduced in states of estrogen deficiency, and is related to the impairment in NO bioavailability and EDD observed in estrogen-deficient postmenopausal women. Our findings have important implications for the development of CVD in postmenopausal women and for interpreting the cardiovascular outcomes of hormone replacement trials.

### Acknowledgments

We thank Thierry LeJemtel, Ashok Talreja, and Anita Banerjee from the Albert Einstein School of Medicine for their role in

developing the measurements of venous endothelial cell protein expression; and Rhea Chiang and Ashley DePaulis from the University of Colorado Boulder for their technical assistance.

Address all correspondence and requests for reprints to: Kerrie Moreau, Ph.D., Assistant Professor of Medicine, Division of Geriatric Medicine, University of Colorado Denver, Building L15, Room 8111, 12631 East 17th Avenue, P.O. Box 6511, Aurora, Colorado 80045. E-mail: Kerrie.Moreau@ucdenver.edu.

This work was supported by National Institutes of Health awards AG020683, AG022241, and AG013038, and by the General Clinical Research Center (RR-00051).

Disclosure Summary: The authors have nothing to disclose.

## References

- 2004 Heart disease and stroke statistics—2005 update. Dallas: American Heart Association
- Celermajer DS, Sorensen KE, Spiegelhalter DJ, Georgakopoulos D, Robinson J, Deanfield JE 1994 Aging is associated with endothelial dysfunction in healthy men years before the age-related decline in women. *J Am Coll Cardiol* 24:471–476
- Taddei S, Virdis A, Ghiadoni L, Mattei P, Sudano I, Bernini G, Pinto S, Salvetti A 1996 Menopause is associated with endothelial dysfunction in women. *Hypertension* 28:576–582
- Barton M, Meyer MR, Haas E 2007 Hormone replacement therapy and atherosclerosis in postmenopausal women: does aging limit therapeutic benefits? *Arterioscler Thromb Vasc Biol* 27:1669–1672
- Mendelsohn ME 2000 Mechanisms of estrogen action in the cardiovascular system. *J Steroid Biochem Mol Biol* 74:337–343
- Miller VM, Duckles SP 2008 Vascular actions of estrogens: functional implications. *Pharmacol Rev* 60:210–241
- Pinna C, Cignarella A, Sanvito P, Pelosi V, Bolego C 2008 Prolonged ovarian hormone deprivation impairs the protective vascular actions of estrogen receptor  $\alpha$  agonists. *Hypertension* 51:1210–1217
- Rubanyi GM, Freay AD, Kauser K, Sukovich D, Burton G, Lubahn DB, Couse JF, Curtis SW, Korach KS 1997 Vascular estrogen receptors and endothelium-derived nitric oxide production in the mouse aorta. Gender difference and effect of estrogen receptor gene disruption. *J Clin Invest* 99:2429–2437
- Stirone C, Duckles SP, Krause DN 2003 Multiple forms of estrogen receptor- $\alpha$  in cerebral blood vessels: regulation by estrogen. *Am J Physiol Endocrinol Metab* 284:E184–E192
- Thionkhan CE, Chambliss KL, Gibson LL, Hahner LD, Mendelsohn ME, Shaul PW 2002 Estrogen causes dynamic alterations in endothelial estrogen receptor expression. *Circ Res* 91:814–820
- Colombo PC, Ashton AW, Celaj S, Talreja A, Banchs JE, Dubois NB, Marinaccio M, Malla S, Lachmann J, Ware JA, LeJemtel TH 2002 Biopsy coupled to quantitative immunofluorescence: a new method to study the human vascular endothelium. *J Appl Physiol* 92:1331–1338
- Colombo PC, Banchs JE, Celaj S, Talreja A, Lachmann J, Malla S, DuBois NB, Ashton AW, Latif F, Jorde UP, Ware JA, LeJemtel TH 2005 Endothelial cell activation in patients with decompensated heart failure. *Circulation* 111:58–62
- Feng L, Stern DM, Pile-Spellman J 1999 Human endothelium: endovascular biopsy and molecular analysis. *Radiology* 212:655–664
- Donato AJ, Black AD, Jablonski KL, Gano LB, Seals DR 2008 Aging is associated with greater nuclear NF $\kappa$ B, reduced I $\kappa$ B $\alpha$  and increased expression of proinflammatory cytokines in vascular endothelial cells of healthy humans. *Aging Cell* 7:805–812
- Donato AJ, Eskurza I, Silver AE, Levy AS, Pierce GL, Gates PE, Seals DR 2007 Direct evidence of endothelial oxidative stress with aging in humans: relation to impaired endothelium-dependent dilation and upregulation of nuclear factor- $\kappa$ B. *Circ Res* 100:1659–1666
- Eskurza I, Kahn ZD, Seals DR 2006 Xanthine oxidase does not contribute to impaired peripheral conduit artery endothelium-dependent dilatation with ageing. *J Physiol* 571:661–668
- Silver AE, Beske SD, Christou DD, Donato AJ, Moreau KL, Eskurza I, Gates PE, Seals DR 2007 Overweight and obese humans demonstrate increased vascular endothelial NAD(P)H oxidase-p47phox expression and evidence of endothelial oxidative stress. *Circulation* 115:627–637
- Celermajer DS, Sorensen KE, Gooch VM, Spiegelhalter DJ, Miller OI, Sullivan ID, Lloyd JK, Deanfield JE 1992 Non-invasive detection of endothelial dysfunction in children and adults at risk of atherosclerosis. *Lancet* 340:1111–1115
- Eskurza I, Monahan KD, Robinson JA, Seals DR 2004 Effect of acute and chronic ascorbic acid on flow-mediated dilatation with sedentary and physically active human ageing. *J Physiol* 556:315–324
- Eskurza I, Seals DR, DeSouza CA, Tanaka H 2001 Pharmacologic versus flow-mediated assessments of peripheral vascular endothelial vasodilatory function in humans. *Am J Cardiol* 88:1067–1069
- Doshi SN, Naka KK, Payne N, Jones CJ, Ashton M, Lewis MJ, Goodfellow J 2001 Flow-mediated dilatation following wrist and upper arm occlusion in humans: the contribution of nitric oxide. *Clin Sci (Lond)* 101:629–635
- Hashimoto M, Akishita M, Eto M, Ishikawa M, Kozaki K, Toba K, Sagara Y, Taketani Y, Orimo H, Ouchi Y 1995 Modulation of endothelium-dependent flow-mediated dilatation of the brachial artery by sex and menstrual cycle. *Circulation* 92:3431–3435
- Williams MR, Westerman RA, Kingwell BA, Paige J, Blombery PA, Sudhir K, Komesaroff PA 2001 Variations in endothelial function and arterial compliance during the menstrual cycle. *J Clin Endocrinol Metab* 86:5389–5395
- Lecce G, Meduri G, Ancelin M, Bergeron C, Perrot-Appianat M 2001 Presence of estrogen receptor  $\beta$  in the human endometrium through the cycle: expression in glandular, stromal, and vascular cells. *J Clin Endocrinol Metab* 86:1379–1386
- Sakaguchi H, Fujimoto J, Aoki I, Tamaya T 2003 Expression of estrogen receptor  $\alpha$  and  $\beta$  in myometrium of premenopausal and postmenopausal women. *Steroids* 68:11–19
- Pinzone JJ, Stevenson H, Strobl JS, Berg PE 2004 Molecular and cellular determinants of estrogen receptor  $\alpha$  expression. *Mol Cell Biol* 24:4605–4612
- Maggi A, Cignarella A, Brusadelli A, Bolego C, Pinna C, Puglisi L 2003 Diabetes undermines estrogen control of inducible nitric oxide synthase function in rat aortic smooth muscle cells through overexpression of estrogen receptor- $\beta$ . *Circulation* 108:211–217
- Bird AP 1986 CpG-rich islands and the function of DNA methylation. *Nature* 321:209–213
- Issa JP, Ottaviano YL, Celano P, Hamilton SR, Davidson NE, Baylin SB 1994 Methylation of the oestrogen receptor CpG island links ageing and neoplasia in human colon. *Nat Genet* 7:536–540
- Post WS, Goldschmidt-Clermont PJ, Wilhide CC, Heldman AW, Sussman MS, Ouyang P, Milliken EE, Issa JP 1999 Methylation of the estrogen receptor gene is associated with aging and atherosclerosis in the cardiovascular system. *Cardiovasc Res* 43:985–991
- Sudhir K, Chou TM, Chatterjee K, Smith EP, Williams TC, Kane JP, Malloy MJ, Korach KS, Rubanyi GM 1997 Premature coronary artery disease associated with a disruptive mutation in the estrogen receptor gene in a man. *Circulation* 96:3774–3777
- Widlansky ME, Gokce N, Keaney Jr JF, Vita JA 2003 The clinical implications of endothelial dysfunction. *J Am Coll Cardiol* 42:1149–1160
- Tan E, Gurjar MV, Sharma RV, Bhalla RC 1999 Estrogen receptor- $\alpha$  gene transfer into bovine aortic endothelial cells induces eNOS gene expression and inhibits cell migration. *Cardiovasc Res* 43:788–797

34. Kim KH, Moriarty K, Bender JR 2008 Vascular cell signaling by membrane estrogen receptors. *Steroids* 73:864–869
35. Mendelsohn ME, Karas RH 2007 HRT and the young at heart. *N Engl J Med* 356:2639–2641
36. Sudhir K, Chou TM, Messina LM, Hutchison SJ, Korach KS, Chatterjee K, Rubanyi GM 1997 Endothelial dysfunction in a man with disruptive mutation in oestrogen-receptor gene. *Lancet* 349:1146–1147
37. Silver A, Christou D, Beske S, Moreau K, Donato A, Seals D, Protein expression in vascular endothelial cells obtained from human peripheral arteries and veins. *J Vasc Res* 47:1–8
38. Mosca L, Appel LJ, Benjamin EJ, Berra K, Chandra-Strobos N, Fabunmi RP, Grady D, Haan CK, Hayes SN, Judelson DR, Keenan NL, McBride P, Oparil S, Ouyang P, Oz MC, Mendelsohn ME, Pasternak RC, Pinn VW, Robertson RM, Schenck-Gustafsson K, Sila CA, Smith Jr SC, Sopko G, Taylor AL, Walsh BW, Wenger NK, Williams CL 2004 Evidence-based guidelines for cardiovascular disease prevention in women. *Circulation* 109: 672–693
39. Lakatta EG, Levy D 2003 Arterial and cardiac aging: major shareholders in cardiovascular disease enterprises. Part I: aging arteries: a “set up” for vascular disease. *Circulation* 107:139–146
40. Losordo DW, Kearney M, Kim EA, Jekanowski J, Isner JM 1994 Variable expression of the estrogen receptor in normal and atherosclerotic coronary arteries of premenopausal women. *Circulation* 89:1501–1510
